# Supplementary material for: Glutathione S-transferase Mu 2-transduced mesenchymal stem cells ameliorated anti-glomerular basement membrane antibody-induced glomerulonephritis by inhibiting oxidation and inflammation
Source: PubMed Central journal article supplement (PMC4055015; doi:10.1186/scrt408), 2014-01-30

Figure S1

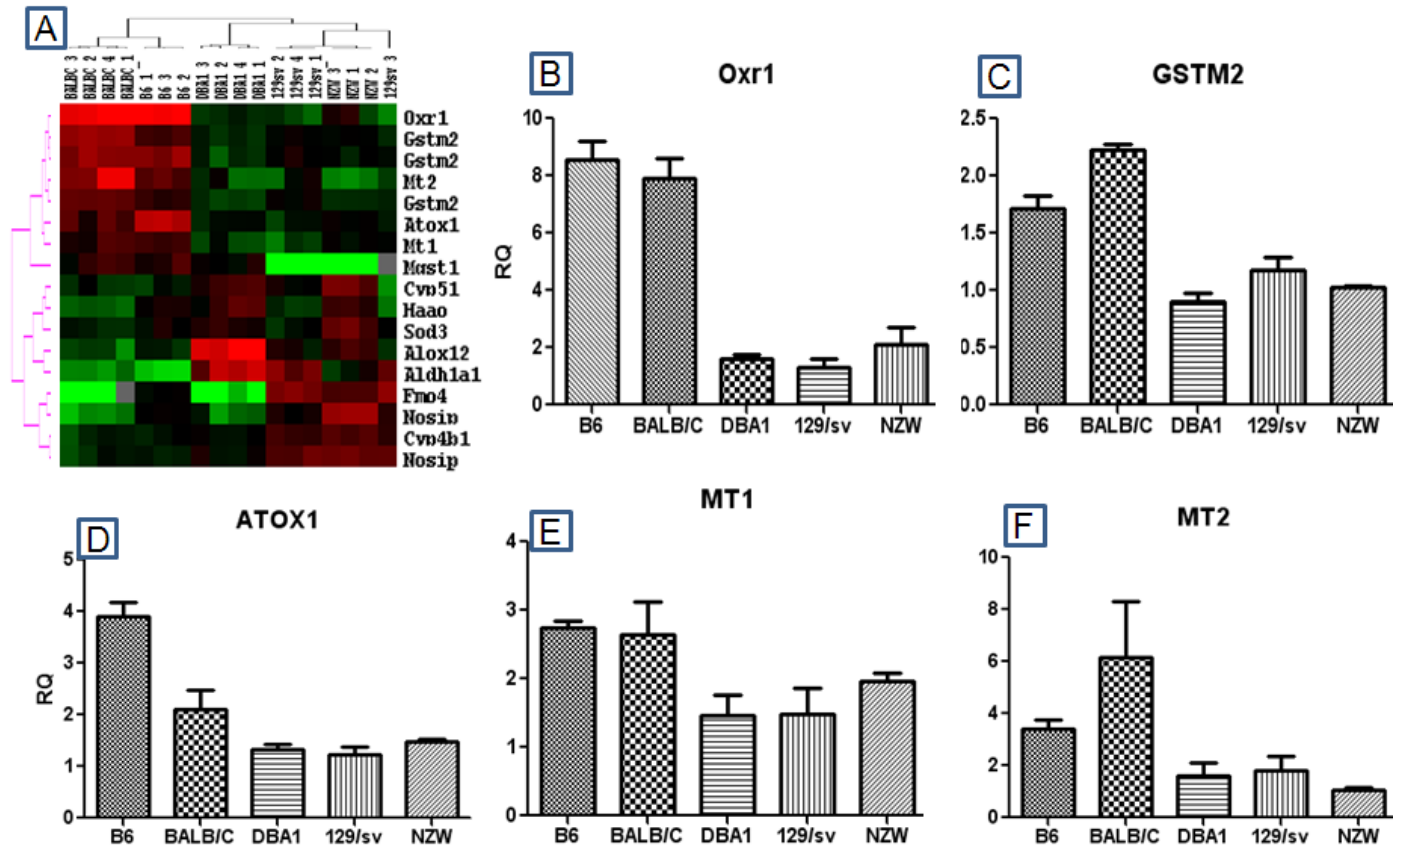

Supplement: scrt408-S1.pdf [file scrt408-S1.pdf]
